# Supplementary figures and images for: Circulating Tumour DNA Analysis for Tumour Genome Characterisation and Monitoring Disease Burden in Extramedullary Multiple Myeloma
Source: MDPI journal article supplement (doi:10.3390/ijms19071858), 2018-06-24

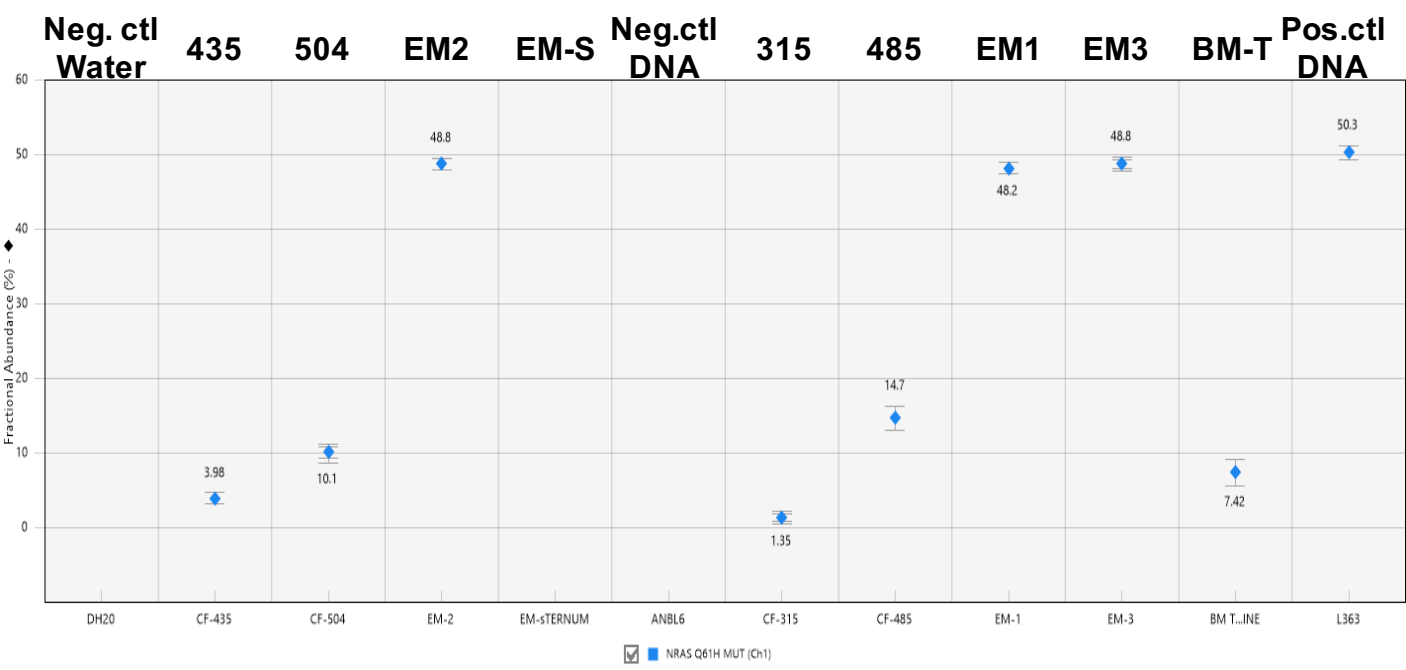

Supplement: s1 [file s1]
